# Synthesis of acid treated carbonized mandarin peel for purification of copper

T. Unugul<sup>a</sup> and F. U. Nigiz<sup>b,\*</sup>

<sup>a</sup>Chemical Engineering Department, Kocaeli University, 41380, Kocaeli, Turkey

<sup>b</sup>Chemical Engineering Department, Çanakkale Onsekiz Mart University, Çanakkale, 17020, Turkey

\*Corresponding author. E-mail: filiz.ugurr@gmail.com

## Abstract

In this study; acid treated carbonized mandarin peel (CMP) adsorbent was prepared and the adsorption behaviour of the adsorbent for copper removal was investigated. In the adsorption studies the effects of initial metal concentration, solution pH, adsorbent dosage and contact time on the removal were investigated. As a result; the highest removal of 100% was achieved when the copper concentration in water was 5 mg/L and the adsorbent dosage was 3.75 g/L at a solution pH of 7. Isotherm studies were also done and the appropriate isotherm was obtained as the Freundlich isotherm. According to the kinetic studies, the copper adsorption onto CMP adsorbent was adopted to the pseudo-second-order adsorption kinetic. After HCl regeneration, the adsorbent maintained 94% of its activity.

**Key words:** copper removal, isotherm, kinetic, mandarin peel based activated carbon

## Highlights

- An acid-treated carbonized mandarin peel (CMP) adsorbent was synthesized
- A complete copper removal was achieved
- The increasing adsorbent dosage increased the removal
- The CMP maintained 94% of its activity after HCl regeneration

## Graphical Abstract

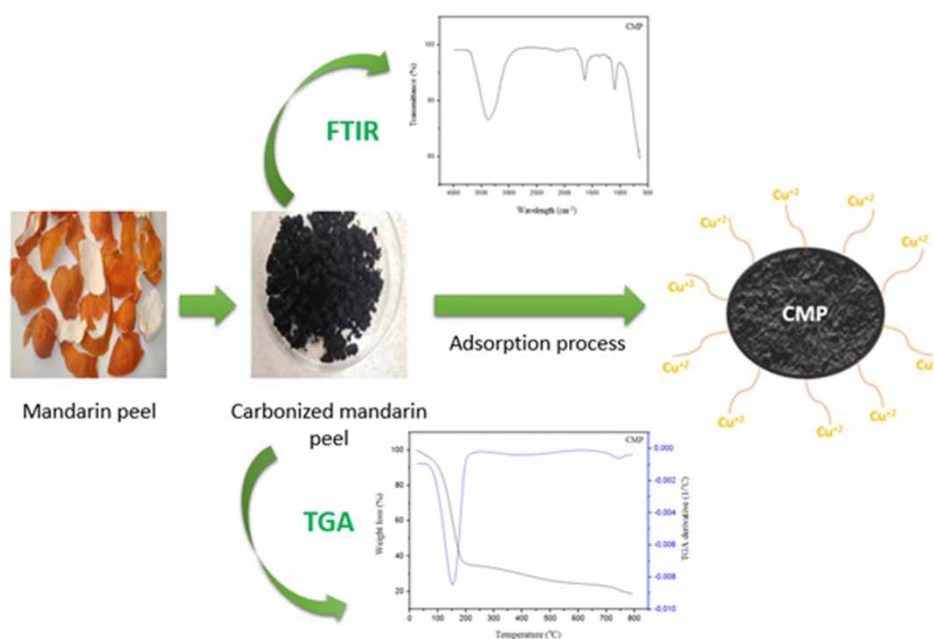

## INTRODUCTION

Technological growth has led to a negative effect on the environment. Inorganic and organic pollutants cause environmental problems due to the industrial effluent of the mining, paint, leather and textile processes (Enniya *et al.* 2018). Industrial pollution can be categorized as soil, air, and water pollution. Especially, heavy metal contamination in water is crucial since they are non-biodegradable and affect the living organism. Various methods such as precipitation, coagulation and flocculation (Yi *et al.* 2017), reverse osmosis (Amuda & Amoo 2007), membrane filtration, ion exchange (Kurniawan *et al.* 2006), and adsorption (Thuan *et al.* 2017) can be used for heavy metal removal from wastewater. Adsorption is one of the effective, low-cost, modular processes for wastewater treatment. On the other hand, the performance of the method is limited by the performance of the adsorbent. Recently, studies on the development of reusable bio-based waste adsorbent have attracted attention. The carbon-based materials produced from the biological feedstock are defined as non-toxic and low-cost adsorbent sources (Hashemian *et al.* 2014). The efficiency of these materials can be improved by increasing their surface area, porous structure, and functional groups (Yahya *et al.* 2015; Thuan *et al.* 2017; Saidi *et al.* 2019). Many vegetable foods can be converted to effective adsorbents. In the literature, the peel of apple (Enniya *et al.* 2018), banana (Thuan *et al.* 2017), coconut (Gratuito *et al.* 2008), Litchi (Yi *et al.* 2017), orange (Hashemian *et al.* 2014), sugarcane bagasse (Foo *et al.* 2013), and mandarin (Koyuncu *et al.* 2018) is reported to be a good candidate for an effective carbon-based adsorbent.

According to the data of the United Nations Food and Agriculture Organization (FAO) 2013, 21 million tons of mandarin are produced in a year. Turkey is the biggest supplier of mandarins with a production capacity of 872 thousand tons. The amount of waste peel in the mandarin is approximately 8–14% by weight. Utilizing waste peels as valuable substances and reusing them as useful products positively affects the supplier economy. Valuable organic essences, oil species, and some other chemicals can be produced by the regeneration of these peels. These chemicals can be used in the cosmetic and pharmaceutical industries. However, after the removal of these important chemicals, mandarin peel residue still has a vast amount of biomass. The remaining biomass can be used as an effective adsorbent owing to the lignocellulosic and phenolic content (Mudyawabikwa *et al.* 2017; Koyuncu *et al.* 2018). In the literature, peels are converted to activated carbon by using a series of difficult, long and expensive processes. Thereby, the cost of the adsorbent increases depending on the process difficulty (Dod *et al.* 2012; Azharul-Islam *et al.* 2017; Shakoor & Nasar 2017). In this study, an alternative technique is proposed to produce a carbon-based adsorbent from the mandarin peel. In this study, the efficiency of the acid-treated carbonized mandarin peel (CMP) was tested to remove copper from a simulated copper-incorporated wastewater for the first time. The effects of initial copper concentration, solution pH, adsorbent dosage and contact time on copper removal were investigated.

## EXPERIMENTAL

### Materials

Copper sulfate pentahydrate was provided from Merck Chemicals, Turkey. Sulfuric acid ( $H_2SO_4$ ) and sodium hydroxide (NaOH), which were used to convert the mandarin peels into functionalized carbon adsorbent, were provided from Merck Chemicals, Turkey.

### Adsorbent preparation

The mandarin peel was washed with distilled water and dried in an oven (Santez SE-45F) at 100 °C for 24 hours. The functionalization was carried out in a hydrothermal reactor at 105 °C with 1 M of

H<sub>2</sub>SO<sub>4</sub> solution for four hours. The acid treated carbonized mandarin peels (CMP) were dried in an oven at 70 °C for one day. Following the drying process, CMP was neutralized with 2 M NaOH solution. After the neutralization, CMP was dried in a vacuum oven at 70 °C for 2 hours.

### Adsorbent characterization

In order to identify the active functional groups in CMP, Fourier-Transform Infrared (Perkin Elmer-Spectrum 100) spectra were studied between the wavelengths of 600–4,000 cm<sup>-1</sup>. The thermal behavior and the degradation period of CMP were determined using Thermogravimetric Analysis (TGA-Mettler Toledo) in the temperature range of 25–800°C with a heating rate of 20°C/min.

### Batch adsorption studies

In this study, the effects of heavy metal concentration, adsorbent dosage, pH, and the adsorption time on adsorption performances were investigated. Firstly, a stock solution of 1,000 mg/L Cu was prepared by diluting the copper sulphate pentahydrate. Then, varying concentrations of Cu (5, 15, 25 mg/L) were prepared from the stock solution. After determining the heavy metal concentration that gives the highest removal performance, the effect of the adsorbent dosage (0.625, 2.1875, 3.75 g/L) was investigated. The experiments were carried out in 100 mL Erlenmeyer with a total solution of 20 mL in a fixed mixer. Prior to performing the absorbance measurement, the solution was centrifuged and filtered. The absorbance of the purified solution was measured by means of a UV/visible spectrophotometer (Thermo Spectronic) with a wavelength of 790 nm. The metal removal (R) (%) and the adsorption capacity at the equilibrium state q<sub>e</sub> (mg/g) were calculated using Equations (1) and (2), respectively.

$$R(\%) = \frac{(C_o - C_t)}{C_o} \times 100 \quad (1)$$

$$q_e = \frac{(C_o - C_e)}{W} \times V \quad (2)$$

where C<sub>o</sub>, C<sub>t</sub>, and C<sub>e</sub> are the initial, at a given time t, and equilibrium heavy metal concentration (mg/L), V is the volume of the heavy metal solution (L), W is the weight of the adsorbent (g). The metal removal was calculated from the absorbance of the solution measured before and after the adsorption. The concentrations were calculated by means of Lambert Beer's law.

### Isotherm investigations

Langmuir (Equation (3)) and Freundlich (Equation (4)) isotherms were adapted to the experimental results and the appropriate isotherm was determined by means of the following equations (Greenlee *et al.* 2009; Enniya *et al.* 2018):

$$\frac{C_e}{q_e} = \frac{1}{q_{\max} \cdot K_L} + \frac{C_e}{q_{\max}} \quad (3)$$

where K<sub>L</sub> is the Langmuir constant (mg/L), q<sub>max</sub> is the maximum monolayer adsorption capacity of the adsorbent (mg/g).

$$\ln q_e = \ln K_f + \frac{1}{n} \ln C_e \quad (4)$$

where  $K_F$  and  $n$  are the Freundlich constant.  $1/n$  should be between '0' and '1'.

$$R_L = \frac{1}{1 + K_L C_0} \quad (5)$$

where  $R_L$  is the separation factor (Equation (5)). If the  $R_L$  value is between '0' and '1', then the adsorption isotherm is acceptable. If  $R_L$  is greater than 1, then the adsorption is define as unfavorable. If the  $R_L$  value equal to '0' or '1', then the adsorption is accepted as irreversible and linear, respectively (Ho & McKay 1998).

### Kinetic studies

The amount of adsorbate which is adsorbed per unit mass of adsorbent  $q_t$  (mg/g) at a given time was calculated by using Equation (6). The adsorption kinetics of copper ions on the mandarin peel was investigated by accepting the kinetics as pseudo-first-order (Equation (7)), pseudo-second-order (Equation (8)).

$$q_t = \frac{C_0 - C_t}{W} \times V \quad (6)$$

$$\ln(q_e - q_t) = \ln q_e - K_1 t \quad (7)$$

$$\frac{t}{q_t} = \frac{1}{K_2 q_e^2} + \frac{1}{q_e} \times t \quad (8)$$

where  $q_t$  is the amount of adsorbate that is adsorbed per unit mass of adsorbent (mg/g),  $t$  is time (minute),  $K_1$  and  $K_2$  are pseudo-first order, pseudo-second order kinetic model rate constants (Ponnusami *et al.* 2009).

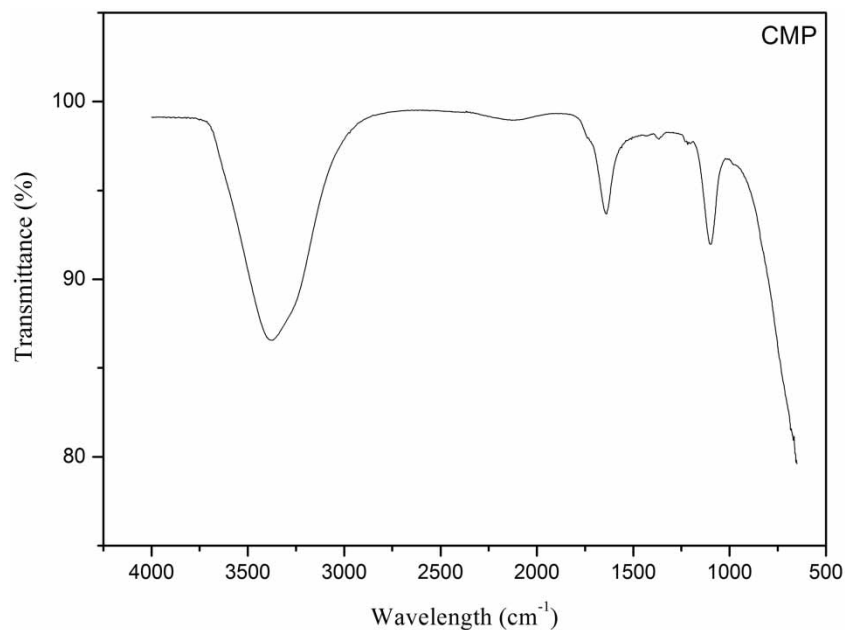

**Figure 1** | FTIR spectra of adsorbent.

## RESULT AND DISCUSSION

### Characterization of the adsorbent

Figure 1 shows the FTIR spectra of CMP adsorbent. The peak at  $3,360\text{ cm}^{-1}$  is assigned to the presence of -OH groups. The alkene stretching vibration of C = C is observed at  $1,642\text{ cm}^{-1}$ . The peaks at  $1,229\text{ cm}^{-1}$  and  $1,218\text{ cm}^{-1}$  should be assigned to the C-O stretching of ether and ester groups, respectively. The peak at  $1,100\text{ cm}^{-1}$  is corresponding to the C-H stretching vibration (Rout *et al.* 2015; Zhang *et al.* 2014; Rattanapan *et al.* 2017).

The thermal stability of the CMP was determined by means of the TGA test. Figure 2 shows the weight loss of CMP depending on the temperature. It is clear from the figure that the degradation of CMP occurs in three steps. The degradation before the temperature of  $100\text{--}105\text{ }^{\circ}\text{C}$  is corresponding to the moisture inside the adsorbent. The first decomposition temperature from  $100\text{ }^{\circ}\text{C}$  to  $200\text{ }^{\circ}\text{C}$  is due to the volatile organic compounds in CMP. The second decomposition temperature from  $200\text{ }^{\circ}\text{C}$  to  $450\text{ }^{\circ}\text{C}$  is corresponding to the decomposition of the cellulose and hemicellulose in the adsorbent. The last degradation temperature from  $450\text{ }^{\circ}\text{C}$  to  $700\text{ }^{\circ}\text{C}$  should be attributed to the degradation of lignin (Gaur *et al.* 2018; Sabela *et al.* 2019). After  $700\text{ }^{\circ}\text{C}$ , there is no significant weight loss.

Contact time is one of the effective parameters of the low-cost adsorption process. It directly affects the adsorption performance. For a high-performance and cost-effective process, it is desired to complete the adsorption process in a short adsorption time. Figure 3 shows the effect of contact time on copper removal; when the metal concentration was  $5\text{ mg/L}$ , the adsorbent concentration was  $3.75\text{ g/L}$  and the solution pH value was 7.

The copper removal was  $87.51\%$  in the first 90 minutes and then reached  $100\%$  of removal within 150 minutes. As shown in the figure, the removal of heavy metal ions showed a significant increase up to 90 minutes. After 90 minutes, the adsorption layer became saturated. The driving force between the adsorbent and metal ions maximized the mass transfer (Souza *et al.* 2018). The optimum contact time was determined as 150 minutes by providing a dynamic balance.

Heavy metal concentration is an important parameter for mass transfer during the adsorption process. (King *et al.* 2006; Mobasherpour *et al.* 2014). The appropriate metal concentration leads to an increase in the adsorption efficiency by increasing the interaction between the adsorbent surface and metal (Semerciöz *et al.* 2017). In this study, the effect of initial metal concentration on the

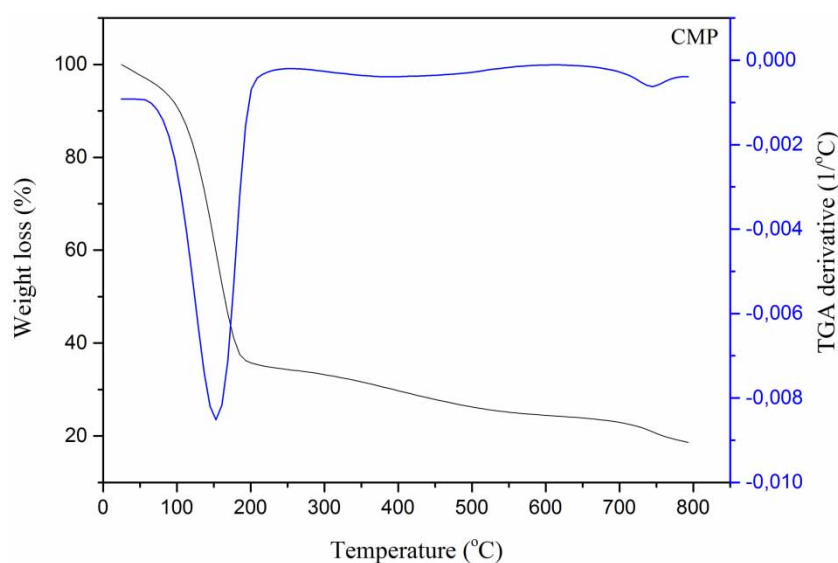

Figure 2 | TGA curve of adsorbent.

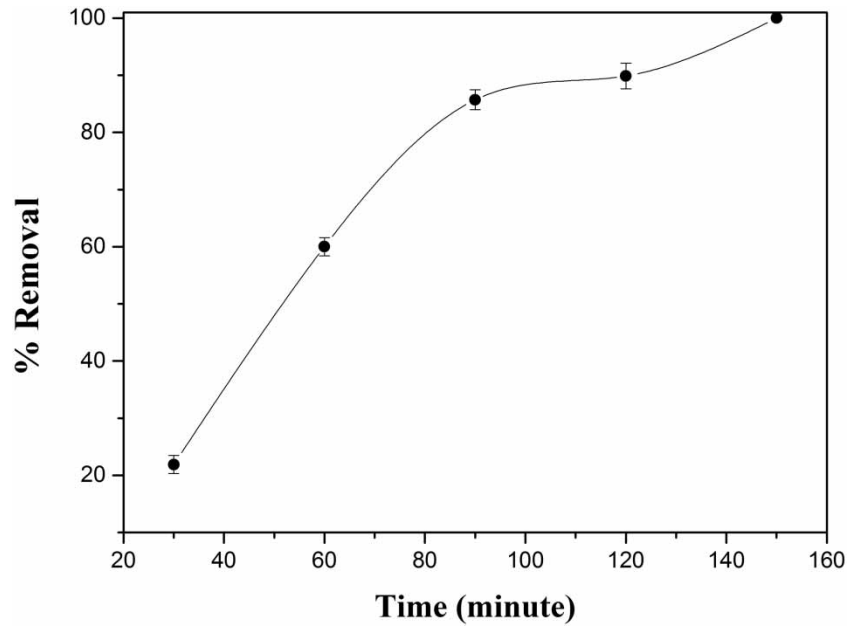

**Figure 3** | Effect of contact time (5 mg/L Cu, 3.75 g/L adsorbent, pH: 7).

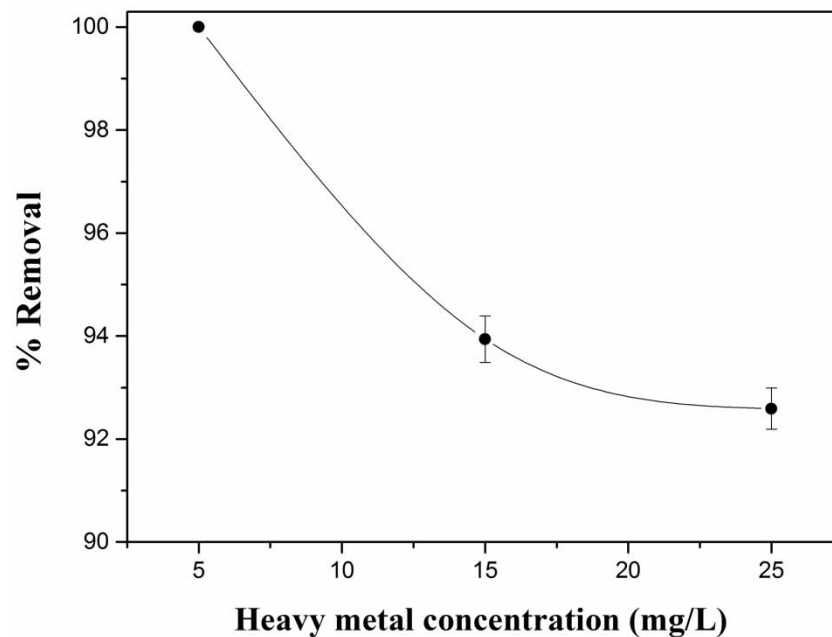

**Figure 4** | Effect of metal concentration (3.75 g/L adsorbent, pH: 7, 150 min).

removal of copper from a copper-water solution was evaluated. Experiments were conducted with a constant adsorbent concentration of 3.75 g/L when the solution pH was 7 and the contact time was 150 minutes. The initial metal concentrations were changed from 5 mg/L to 15 mg/L and 25 mg/L. The effect of metal concentration on removal is illustrated in [Figure 4](#).

[Figure 4](#) shows that 100% of copper removal was achieved at low metal concentrations (5 mg/L). As the metal concentration was increased from 5 mg/L to 25 mg/L, the removal gradually decreased from 100% to 92.59%. The decrement should be attributed to the saturation of the active sites of the adsorbent with the metal ([Moghadam et al. 2013](#); [Semerjian 2018](#)). Therefore, increasing metal concentration in the solution caused a decrease in the removal.

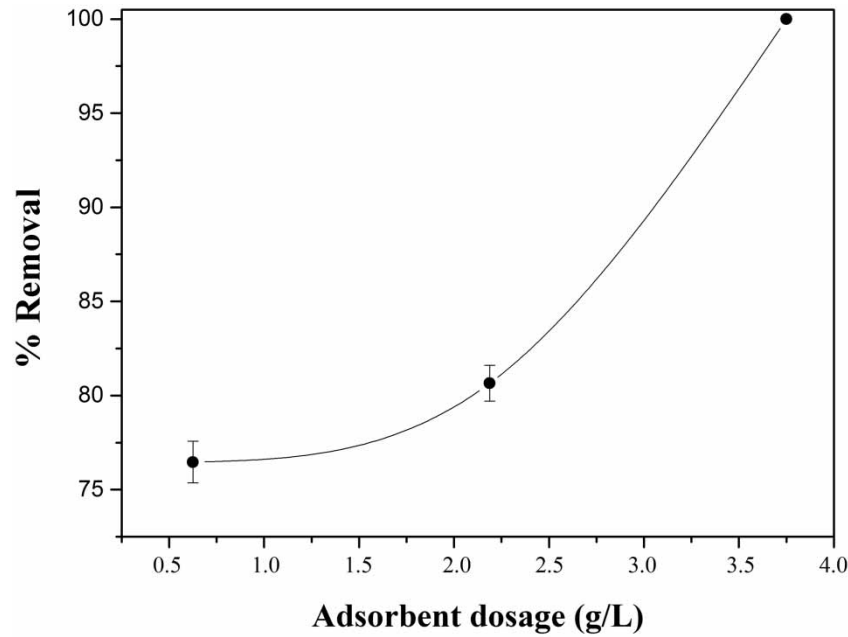

**Figure 5** | Effect of adsorbent dosage (5 mg/L Cu, pH: 7, 150 min).

The adsorbent dosage or adsorbent concentration is another important parameter for the performance of the adsorption process. An increase in the adsorbent dosage directly affects the total cost of the adsorption process and recycling. Figure 5 displays the effect of adsorbent concentration on the copper removal process when the metal concentration was 5 mg/L, the solution pH value was 7 and the contact time was 150 minutes.

The removal enhanced from 76.47% to 100% when the adsorbent dosage increased from 0.625 g/L to 3.75 g/L. The concentration of the adsorbent determines the number of binding sites for adsorption. As the amount of the adsorbent increases in the adsorption media, the total surface area and the empty adsorption sites increase (Tadepalli *et al.* 2016). Therefore, adsorption performance increases as it was also obtained in the present study.

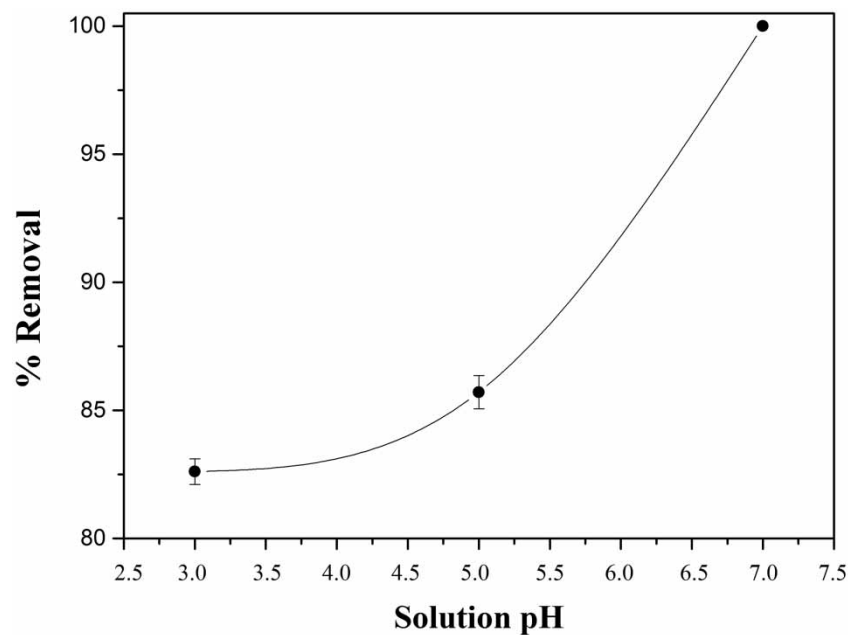

**Figure 6** | Effect of the solution pH (5 mg/L Cu, 3.75 g/L adsorbent, 150 min).



The surface charge of the adsorbent affects the ion concentration and the degree of ionization of functional groups (carboxyl, hydroxyl, amino) in the adsorbent (Othman *et al.* 2012). The active surface sites of the adsorbent also change with the pH of the media. Since the adsorption performance is directly related to the active sites on the adsorbent, the varying pH also affects the adsorption performance (Ali *et al.* 2016). The effect of solution pH (pH:3, pH:5, pH:7) on the removal of Cu was investigated when the metal concentration was 5 mg/L, the adsorbent dosage was 3.75 g/L and the contact time was 150 minutes. The removal results are illustrated in Figure 6. As shown in the figure, 82.61% of copper removal was obtained when the pH of the solution was 3. At the same conditions (adsorbent dosage, copper concentration and contact time), 100% of removal was achieved when the pH was 7. In a strongly acidic environment, the adsorbent surface is positively charged while in a basic environment the adsorbent is charged negatively. This difference affects the adsorbent surface chemistry and leads to a significant change in the adsorption efficiency. As the pH decreases, the concentration of  $\text{H}_3\text{O}^+$  ions increases and the adsorption of copper ions decreases. Similar results have also been obtained and reported by Ali *et al.* (2016).

### Adsorption isotherm studies

The adsorption isotherm shows the distribution of adsorbate molecules between liquid and solid phases while the adsorption process is in an equilibrium state. The different isotherm models and isotherm data can be used to determine a suitable model for design purposes (Ali *et al.* 2016). Adsorption isotherms are used to optimize how the adsorbent interacts with the adsorbate. It gives information about the adsorption mechanism and surface properties of adsorbents. In the present studies, Langmuir (Figure 7(a)) and Freundlich (Figure 7(b)) isotherms were studied by using the removal data obtained from the different metal concentrations (5, 15 and 25 mg/L), a constant adsorbent dosage of 3.75 g/L, a constant adsorption time of 150 minutes, and a constant solution pH of 7. The isotherm data are shown in Table 1. According to the  $R^2$  values, the most suitable isotherm was determined as the Freundlich isotherm. Therefore, it can be evaluated that the adsorption processes through the CMP occurred on heterogenous surfaces.

### Adsorption kinetics

Kinetic models help to estimate the rate constants of adsorption and to explain the mechanism of the adsorption. In the present study, kinetic studies were performed using the metal concentration of 5 mg/L. In this concentration, the highest copper removal was achieved and with the highest

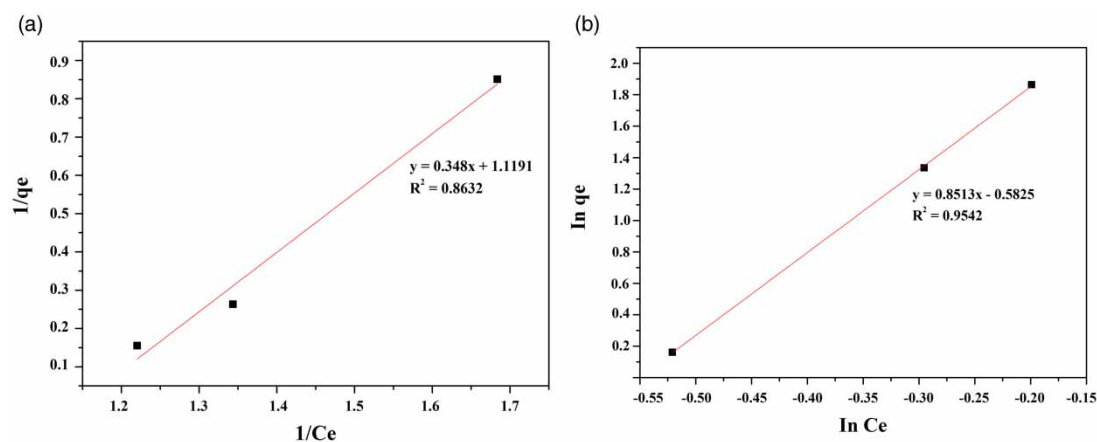

Figure 7 | Langmuir isotherm (a) and Freundlich isotherm (b).



**Table 1** | Langmuir and Freundlich isotherm data

| Heavy metal |       | Cu     |
|-------------|-------|--------|
| Langmuir    | $q_m$ | 0.8936 |
|             | $K_L$ | 3.2158 |
|             | $R^2$ | 0.8632 |
| Freundlich  | $1/n$ | 0.8513 |
|             | $K_F$ | 0.5585 |
|             | $R^2$ | 0.9542 |

adsorption rate. In order to estimate the adsorption mechanism, pseudo-first-order and pseudo-second-order models were applied. The kinetic model parameters are shown in Table 2 ( $C_0$ : 5 mg/L, adsorption dose: 3.75 g/L, pH: 7).

For determining the appropriate kinetic model, both the experimental and calculated  $q_e$  values accompanied with the  $R^2$  value should be taken into account. Figure 8 shows the kinetic plots. According to the results obtained in this study, the pseudo-second order kinetic was suitable. The kinetic model was acceptable since the  $q_e$  value that was calculated from the figure and obtained from the experiment were close to each other. The pseudo-second order kinetic model confirmed that the adsorption rate was independent from the adsorbate concentration and was dependent on the adsorption capacity (Lim *et al.* 2017).

**Table 2** | Kinetic parameters for the adsorption of copper onto CMP

| Heavy metal      |                             | Cu      |
|------------------|-----------------------------|---------|
| Pseudo 1st order | $K_1$ ( $\text{min}^{-1}$ ) | 0,6278  |
|                  | $q_{e,\text{exp}}$ (mg/g)   | 1,17496 |
|                  | $q_{e,\text{cal}}$ (mg/g)   | 1,1751  |
|                  | $R^2$                       | 0,9613  |
| Pseudo 2nd order | $K_2$ (g/mg min)            | 3,6804  |
|                  | $q_{e,\text{exp}}$ (mg/g)   | 1,17496 |
|                  | $q_{e,\text{cal}}$ (mg/g)   | 0,4064  |
|                  | $R^2$                       | 0,9865  |

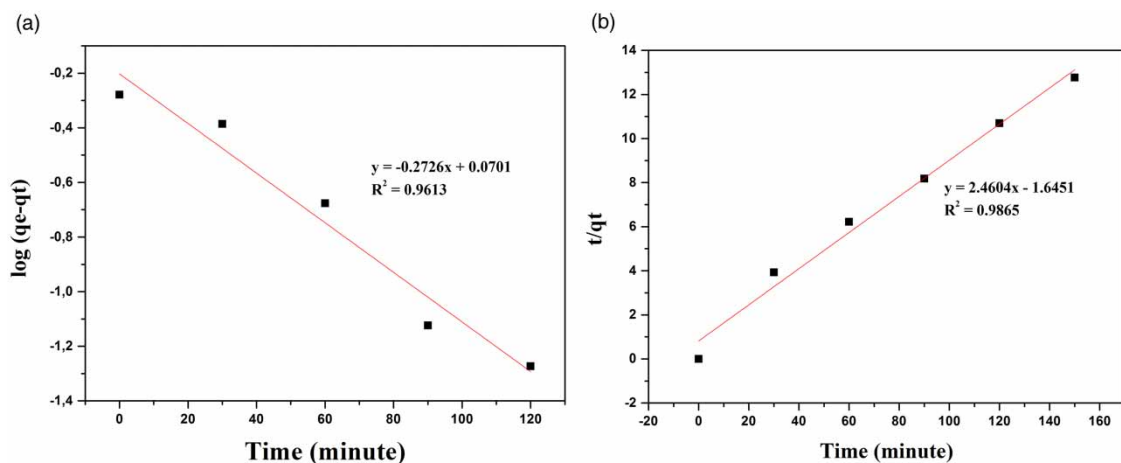**Figure 8** | Pseudo 1st order kinetic model (a); pseudo 2nd order kinetic model (b).

### Adsorption stability and comparison of results with literature

In this study, the removal of copper metal from wastewater by using acid-treated carbonized mandarin peels was investigated. The highest copper removal of 100% was achieved when the copper concentration was 5 mg/L, the adsorbent dosage was 3.75 g/L, and the solution pH was 7. After the adsorption test, the adsorbent was treated with 1 M HCl for four hours, dried and used for the same condition (5 mg/L Cu, 3.75 g/L adsorbent dosage, 7 solution pH). As a result, 94% of removal was achieved with regenerated adsorbent. Table 3 gives the adsorbents and experimental parameters used in copper removal. In the literature, there are no reported studies on heavy metal removal using the acid-treated mandarin peel. Therefore, the adsorbent results obtained from different fruit peels are included in the table.

**Table 3** | Studies removal of copper metal by using agricultural wastes

| Adsorbent     | Initial metal concentration (mg/L) | pH | Time (min) | Removal (%) | Reference                    |
|---------------|------------------------------------|----|------------|-------------|------------------------------|
| Peanut husk   | 10                                 | 7  | 180        | 60          | Salam <i>et al.</i> (2011)   |
| Henna leaves  | 10                                 | 7  | 90         | 91          | Shanthi & Selvarajan (2013)  |
| Origanum      | 10                                 | 7  | 16 h       | 93          | Al-Senani & Al-Fawzan (2018) |
| Cotton plant  | 25                                 | 6  | 90         | 81          | Kamble <i>et al.</i> (2018)  |
| Mandarin peel | 10                                 | 7  | 150        | 100         | This study                   |

### CONCLUSION

In the present study, a new acid-treated and factionalized carbonized adsorbent was synthesized from the mandarin peels and used for the adsorption of simulated copper solution. As a result, it was obtained that the CMP was very effective to remove copper from simulated metal-containing water solution. The highest removal of 100% was obtained when the copper concentration was 5 mg/L, the adsorbent dosage was 3.75 g/L, and the solution pH was 7. After HCl regeneration, the adsorbent maintained 94% of its activity. The Freundlich isotherm was more appropriate to explain the removal of copper from the solution. The kinetic of the heavy metal adsorption onto CMP was obtained as pseudo-second-order. As a result, it can be evaluated that the adsorbent synthesized from the waste mandarin peels is an effective candidate to be used as a low-cost adsorbent.

### REFERENCES

- Ali, R. M., Hamad, H. A., Hussein, M. M. & Malash, G. F. 2016 Potential of using green adsorbent of heavy metal removal from aqueous solutions: adsorption kinetics, isotherm, thermodynamic, mechanism and economic analysis. *Ecological Engineering* **91**, 317–332.
- Al-Senani, G. M. & Al-Fawzan, F. A. 2018 Study on adsorption of Cu and Ba from aqueous solutions using nanoparticles of origanum (OR) and lavandula (LV). *Bioinorganic Chemistry and Applications* **2018**(11), 1–8.
- Amuda, O. S. & Amoo, I. A. 2007 Coagulation/flocculation process and sludge conditioning in beverage industrial wastewater treatment. *Journal of Hazardous Materials* **141**(3), 778–783.
- Azharul-Islam, Md., Ahmed, M. J., Khanday, W. A., Asif, M. & Hameed, B. H. 2017 Mesoporous activated coconut shell-derived hydrochar prepared via hydrothermal carbonization-NaOH activation for methylene blue adsorption. *Journal of Environmental Management* **203**, 237–244.
- Dod, R., Banerjee, G. & Saini, S. 2012 Adsorption of methylene blue using green pea peels (pisum sativum): a cost-effective option for dye-based wastewater treatment. *Biotechnology and Bioprocess Engineering* **17**, 862–874.
- Enniya, I., Rghioui, L. & Jourani, A. 2018 Adsorption of hexavalent chromium in aqueous solution on activated carbon prepared from apple peels. *Sustainable Chemistry and Pharmacy* **7**, 9–16.

- Foo, K. Y., Lee, L. K. & Hameed, B. H. 2013 Preparation of activated carbon from sugarcane bagasse by microwave assisted activation for the remediation of semi-aerobic land-fill leachate. *Bioresource Technology* **134**, 166–172.
- Gaur, N., Kukreja, A., Yadav, M. & Tiwari, A. 2018 Adsorptive removal of lead and arsenic from aqueous solution using soya bean as a novel biosorbent: equilibrium isotherm and thermal stability studies. *Applied Water Science* **8**(4), 98–109.
- Gratuito, M., Panyathanmaporn, T., Chumnanklang, R. A., Sirinuntawittaya, N. & Dutta, A. 2008 Production of activated carbon from coconut shell: Optimization using response surface methodology. *Bioresource Technology* **99**, 4887–4895.
- Greenlee, L. F., Lawler, D. F., Freeman, B. D., Marrot, B. & Moulin, P. 2009 Reverse osmosis desalination: water sources, technology and today's challenges. *Water Research* **43**(9), 2317–2348.
- Hashemian, S., Salari, K. & Yazdi, Z. A. 2014 Preparation of activated carbon from agricultural wastes (almond shell and orange peel) for adsorption of 2-pic from aqueous solution. *Journal of Industrial and Engineering Chemistry* **20**(4), 1892–1900.
- Ho, Y. S. & McKay, G. 1998 Sorption of dye from aqueous solution by pit. *Chemical Engineering Journal* **70**, 115–124.
- Kamble, P. N., Bodade, R. G., Sagar, A. K., Pondhe, G. M., Gaikwad, V. B. & Mane, A. V. 2018 Removal of Copper(II) using bio-adsorbents from prepared aqueous solution. *Nature Environment and Pollution Technology* **17**(1), 215–222.
- King, P., Srinivas, P., Kumar, Y. P. & Prasad, V. S. R. K. 2006 Sorption of copper (III) ion from aqueous solution by *Tectona grandis* lf (teak leaves powder). *Journal of Hazardous Materials* **136**(3), 560–566.
- Koyuncu, F., Güzel, F. & Saygılı, H. 2018 Role of optimization parameters in the production of nanoporous carbon from mandarin sheels by microwave-assisted chemical activation and utilization as dye adsorbent. *Advanced Powder Technology* **29**(9), 2108–2118.
- Kurniawan, T. A., Chan, G. Y. S., Lo, W. H. & Babel, S. 2006 Physico-chemical treatment techniques for wastewater laden with heavy metal. *Chemical Engineering Journal* **118**(1–2), 83–98.
- Lim, L. B. L., Priyantha, N. & Tennakoon, D. T. B. 2017 Breadnut peel as a highly effective low-cost biosorbent for methylene blue: equilibrium, thermodynamic and kinetic studies. *Arabian Journal of Chemistry* **10**(2), 3216–3228.
- Mobasherpour, I., Salahi, E. & Ebrahimi, M. 2014 Thermodynamics and kinetics of adsorption of Cu (II) from aqueous solutions onto multi-walled carbon nanotubes. *Journal of Saudi Chemical Society* **18**(6), 792–801.
- Moghadam, M. R., Nasirizadeh, N., Dashti, Z. & Babanezdah, E. 2013 Removal of Fe (II) from aqueous solution using pomegranate peel carbon: equilibrium and kinetic studies. *International Journal of Industrial Chemistry* **4**(19), 1–6.
- Mudiyawabikwa, B., Mungondori, H., Tichagwa, L. & Katwire, D. M. 2017 Methylene blue removal using a low-cost activated carbon adsorbent from tobacco stems: kinetic and equilibrium studies. *Water Science and Technology* **75**, 2390–2402.
- Othman, Z., Ali, R. & Naushad, M. 2012 Hexavalent chromium removal from aqueous medium by activated carbon prepared from peanut shell: adsorption kinetics, equilibrium and thermodynamic studies. *Chemical Engineering Journal* **184**, 238–247.
- Ponnusami, V., Gunasekar, V. & Srivastava, S. N. 2009 Kinetics of methylene blue removal from aqueous solution using gulmohar (*Delonix regia*) plant leaf powder: multivariate regression analysis. *Journal of Hazardous Materials* **169**(1–3), 119–127.
- Rattanapan, S., Srikram, J. & Kongsune, P. 2017 Adsorption of methyl orange on coffee grounds activated carbon. *Energy Procedia* **138**, 949–954.
- Rout, P. R., Bhunia, P. & Dash, R. R. 2015 A mechanistic approach to evaluate the effectiveness of red soil as a natural adsorbent for phosphate removal from wastewater. *Desalination and Water Treatment* **54**(2), 358–373.
- Sabela, I., Kunene, K., Kanchi, S., Xhakaza, N. M., Battinapata, A., Mdluli, P., Sharma, D. & Bisetty, K. 2019 Removal of copper (II) from wastewater using green vegetable waste derived activated carbon: An approach to equilibrium and kinetic studies. *Arabian Journal of Chemistry* **12**(8), 4331–4339.
- Saidi, S., Boudrahem, F., Yahiaoui, I. & Aissani-Benissad, F. 2019 Agar-agar impregnated on porous activated carbon as a new adsorbent for Pb(II) removal. *Water Science & Technology* **79**(7), 1316–1326.
- Salam, O. E. A., Reiad, N. A. & Shafei, M. M. 2011 A study of the removal characteristics of heavy metals from wastewater by low-cost adsorbents. *Journal of Advanced Research* **2**(4), 297–303.
- Semerçiöz, A. S., Göğüş, F., Çelekli, A. & Bozkurt, H. 2017 Development of carbonaceous material from grapefruit peel with microwave implemented- low temperature hydrothermal carbonization technique for the adsorption of Cu (II). *Journal of Cleaner Production* **165**, 599–610.
- Semerjian, L. 2018 Removal of heavy metal (Cu, Pb) from aqueous solutions using pine (*Pinus hale pensis*) sawdust: equilibrium, kinetic, and thermodynamic studies. *Environmental Technology & Innovation* **12**, 91–103.
- Shakoor, S. & Nasar, A. 2017 Adsorptive treatment of hazardous methylene blue dye from artificially contaminated water using *cucumis sativus* peel waste as a low-cost adsorbent. *Groundwater for Sustainable Development* **5**, 152–159.
- Shanthi, T. & Selvarajan, V. M. 2013 Removal of Cr(VI) and Cu(II) ions from aqueous solution by carbon prepared from henna leaves. *Journal of Chemistry* **2013**, 1–6.
- Souza, W. D. M., Rodrigues, W. S., Filho, M. M. S. L., Alves, J. I. F. & Oliveira, T. M. B. 2018 Heavy metals uptake on *Malpighia emerginata* D. L. seed fiber microparticles: physicochemical characterization, modeling and application in land fill leachate. *Waste Management* **78**, 356–365.
- Tadepalli, S., Murthy, K. S. R. & Rakesh, N. N. 2016 Removal of Cu (II) and Fe (II) from industrial waste water using orange peel as adsorbent in batch mode operation. *International Journal of Chem Tech Research* **9**(5), 290–299.

- Thuan, T. V., Quynh, B. T. P., Nguyen, T. D., Ho, V. T. T. & Boch, L. G. 2017 Response surface methodology approach for optimization of  $\text{Cu}^{+2}$ ,  $\text{Ni}^{+2}$  and  $\text{Pb}^{+2}$  adsorption using KOH activated carbon from banana peel. *Surfaces and Interfaces* **6**, 209–217.
- Yahya, M. A., Al-Qodah, Z. & Ngah, C. W. Z. 2015 Agricultural bio-waste material as potential sustainable precursors used for activated carbon production: a review. *Renewable and Sustainable Energy Reviews* **46**, 218–235.
- Yi, Y., Lv, J., Liu, Y. & Wu, G. 2017 Synthesis and application of modified Litchi peel for removal of hexavalent chromium from aqueous solutions. *Journal of Molecular Liquids* **225**, 28–33.
- Zhang, Y., Zheng, R., Zhao, J., Ma, F., Zhang, Y. & Meng, Q. 2014 Characterization of  $\text{H}_3\text{PO}_4$ -treated rice husk adsorbent and adsorption of Copper(II) from aqueous solution. *BioMed Research International* 2014, 1-8.
